# Supplementary material for: High-performance overall water splitting based on amorphous iron doped cobalt tungstate via facile co-precipitation
Source: Royal Society of Chemistry journal article supplement (doi:10.1039/d1ta00001b), 2021-01-01
Supplement: d1ta00001b1.pdf [file d1ta00001b1.pdf]

Supplementary Information

## **High-Performance Overall Water Splitting Based On Amorphous Iron Doped Cobalt Tungstate Via Facile Coprecipitation**

*Jin Wu, Renjie Xie, Xiangchen Hu, Zhiwei Nie, Yanuo Shi, Yi Yu and Nan Yang\**

School of Physical Science and Technology, ShanghaiTech University, Shanghai, 201210, P. R. China.

The word file include:

Fig. S1 The XRD diffractograms of A-CWO, A-CFWO and corresponding C-CFWO samples.

Fig. S2 The XPS spectra of (a) Fe 2*p*, (b) W 4*f* of A-CFWO and A-CFWO sample.

Fig. S3 Cyclic voltammograms measured in the double layer capacitance region 0.92-1.02 V vs. RHE at the scan rates of 5, 10, 20, 40, 80 and 160 mV s<sup>-1</sup> in 1 M KOH solution. Cyclic voltammograms of (a) A-CFWO (b) A-CWO (c) C-CFWO.

Fig. S4 Polarization curves normalized to the electrochemical active surface area (ECSA).

Fig. S5 The XPS spectra of (a) Co 2*p*, (b) O 1*s* of A-CFWO after OER and HER test.

Table S1 Comparison of binding energy (BE), FWHM and percentage area of each fitting component of Co 2*p*<sub>3/2</sub> region in A-CFWO and the A-CWO electrocatalysts.

Table S2 Comparison of binding energy (BE), FWHM and area percent of each fitting component of O 1*s* in A-CFWO and the A-CWO electrocatalysts.

Table S3 Comparison of binding energy (BE), FWHM and area percent of each fitting component of W 4*f* in A-CFWO and the A-CWO electrocatalysts.

Table S4 Comparison of binding energy (BE), FWHM and area percent of each fitting component of Fe 2*p*<sub>3/2</sub> in A-CFWO electrocatalysts.

Table S5 Comparison of catalytic performance with other reported OER catalysts.

Table S6 Comparison of catalytic performance with other reported HER catalysts.

Table S7 Comparison to other reported bifunctional catalysts.

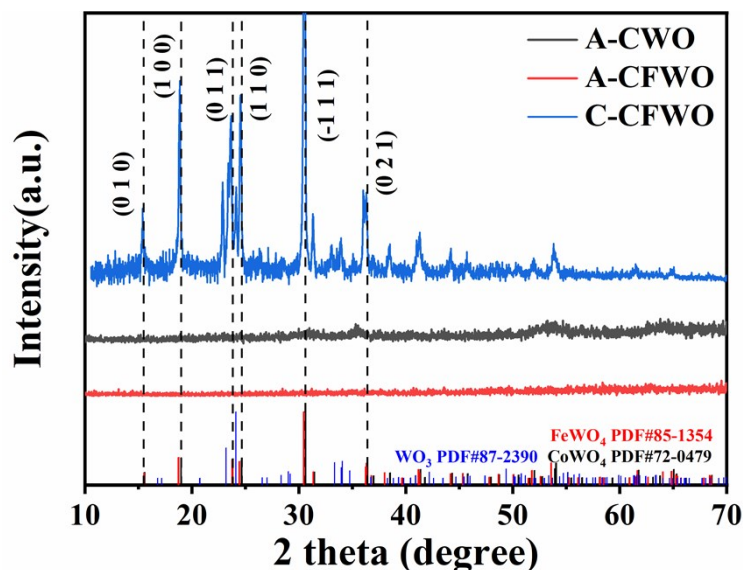

**Fig. S1** The XRD diffractograms of A-CWO, A-CFWO and corresponding C-CFWO samples

The Fe 2*p* and W 4*f* spectra were included in Fig. S2. We adapt the fitting parameters of Fe 2*p* from the ref. 4. The A and B in the main 2*p*<sub>3/2</sub> peak are assigned to Fe<sup>2+</sup> and Fe<sup>3+</sup>, respectively. The satellite peaks C and D at higher binding energy side are considered to be related to Fe<sup>2+</sup> and Fe<sup>3+</sup>, separately. Several constraints are used in order to avoid meaningless fitting. First, the intensity ratio between spin-orbital splitting peaks is assigned to be about two, in agreement with the degeneracy of the spin-orbital split electronic states. Furthermore, the FWHM of peaks is set to be in the range from 2 eV to 4 eV to avoid too broad Gaussian peaks with unphysical meaning. The Fe 2*p* spectrum demonstrates that iron ions are in mixed valence state and confirms the successful incorporation of iron ions in CoWO<sub>4</sub>. W 4*f* spectra are characterized by 7/2 and 5/2 spin-orbital components. The binding energies correspond to the oxidation state of 6+. No noticeable difference was found for A-CWO and A-CFWO.

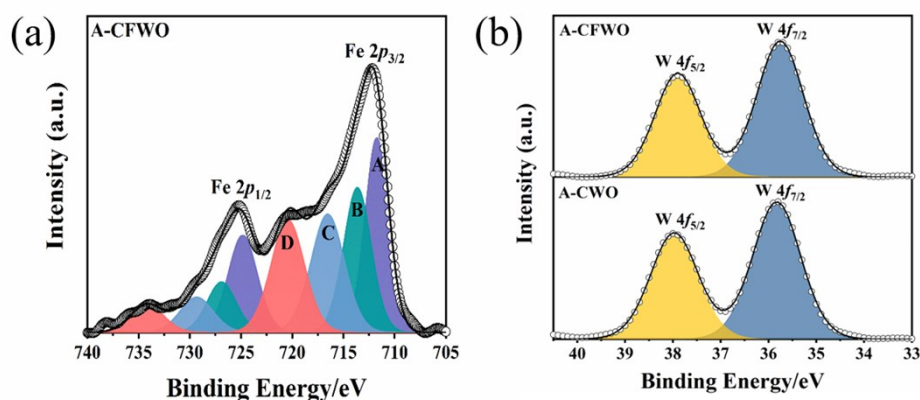

**Fig. S2** The XPS spectra of (a) Fe 2p, (b) W 4f of A-CFWO and A-CWO sample.

**Table S1** Comparison of binding energy (BE), FWHM and percentage area of each fitting component of Co 2p<sub>3/2</sub> region in A-CFWO and the A-CWO electrocatalysts.

| Peak   |         | A      | B      | C      | D      | E      |
|--------|---------|--------|--------|--------|--------|--------|
| A-CFWO | BE (eV) | 781.52 | 783.42 | 785.42 | 787.92 | 791.12 |
|        | FWHM    | 2.26   | 2.50   | 2.50   | 3.43   | 3.50   |
|        | Area    | 1.00   | 0.64   | 0.34   | 0.67   | 0.24   |
| A-CWO  | BE (eV) | 781.50 | 783.30 | 785.37 | 788.00 | 791.70 |
|        | FWHM    | 2.16   | 2.50   | 2.32   | 3.50   | 3.50   |
|        | Area    | 1.00   | 0.80   | 0.33   | 0.71   | 0.20   |

**Table S2** Comparison of binding energy (BE), FWHM and area percent of each fitting component of O 1s in A-CFWO and the A-CWO electrocatalysts. O<sub>L</sub> represents lattice oxygen, O<sub>S</sub> represents surface oxygen.

| Sample  | A-CFWO         |                | A-CWO          |                |
|---------|----------------|----------------|----------------|----------------|
|         | O <sub>L</sub> | O <sub>S</sub> | O <sub>L</sub> | O <sub>S</sub> |
| BE (eV) | 530.99         | 531.93         | 531.06         | 531.91         |
| FWHM    | 1.42           | 2.62           | 1.47           | 2.64           |
| Area    | 1.00           | 0.41           | 1.00           | 0.56           |

**Table S3** Comparison of binding energy (BE), FWHM and area percent of each fitting component of W 4f in A-CFWO and the A-CWO electrocatalysts.

| Sample  | A-CFWO              |                     | A-CWO               |                     |
|---------|---------------------|---------------------|---------------------|---------------------|
|         | W 4f <sub>7/2</sub> | W 4f <sub>5/2</sub> | W 4f <sub>7/2</sub> | W 4f <sub>5/2</sub> |
| BE (eV) | 35.76               | 37.90               | 35.83               | 37.97               |
| FWHM    | 1.20                | 1.17                | 1.23                | 1.22                |
| Area    | 1.00                | 0.75                | 1.00                | 0.77                |

**Table S4** Comparison of binding energy (BE), FWHM and area percent of each fitting component of Fe  $2p_{3/2}$  in A-CFWO electrocatalysts.

| Sample  | A-CFWO |        |        |        |
|---------|--------|--------|--------|--------|
|         | A      | B      | C      | D      |
| BE (eV) | 711.74 | 713.64 | 716.54 | 720.44 |
| FWHM    | 2.82   | 3.30   | 4.00   | 4.00   |
| Area    | 1.00   | 0.87   | 0.86   | 0.82   |

The active surface area of catalysts was calculated from their electrochemical capacitance, which could be measured by cyclic voltammetry. A narrow potential window from 0.92 V to 1.02 V vs. RHE with no faradaic processes was measured and the scan rates were 5, 10, 20, 40, 80 and 160  $\text{mV s}^{-1}$ , as shown in Fig. S3. Therefore, the current should be expected to be linearly proportional to the active surface area due to the charging of the double layer. Then, the plots of the half of the capacitive current density ( $\Delta J$ ,  $(J_{\text{anodic}} - J_{\text{cathodic}})/2$ ) against the scan rate can be plotted, where the slope can be calculated and defined as the double layer capacitance ( $C_{\text{dl}}$ ).

The ECSA of catalysts was further calculated from the  $C_{\text{dl}}$  according to the following

equation: 
$$ECSA = \frac{C_{\text{dl}} (\text{mF cm}^{-2})}{C_s (\text{mF cm}^{-2}) \text{ per cm}^2}$$
. The  $C_{\text{dl}}$  is the double-layer capacitance and  $C_s$  per  $\text{cm}^2$  is the specific capacitance of a planar surface, which is assigned to be 0.04  $\text{mF cm}^{-2}$ , with a standard 1  $\text{cm}^2$  real surface area<sup>1, 2</sup>. The ECSA of A-CFWO, A-CWO and C-CFWO was calculated to be 56.75, 35.25, and 21.75  $\text{cm}^2$ .

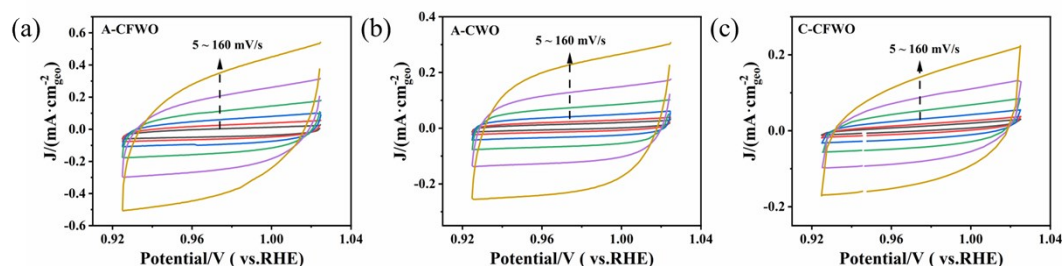

**Fig. S3** Cyclic voltammograms of (a) A-CFWO (b) A-CWO (c) C-CFWO measured in the double layer capacitance region 0.92-1.02 V vs. RHE at the scan rates of 5, 10, 20, 40, 80 and 160  $\text{mV s}^{-1}$  in 1 M KOH solution.

The comparison of ECSA normalized current density can be found in Fig. S4. As can be seen that the ECSA normalized current density is significantly larger in A-CFWO,

revealing its superior intrinsic activity.

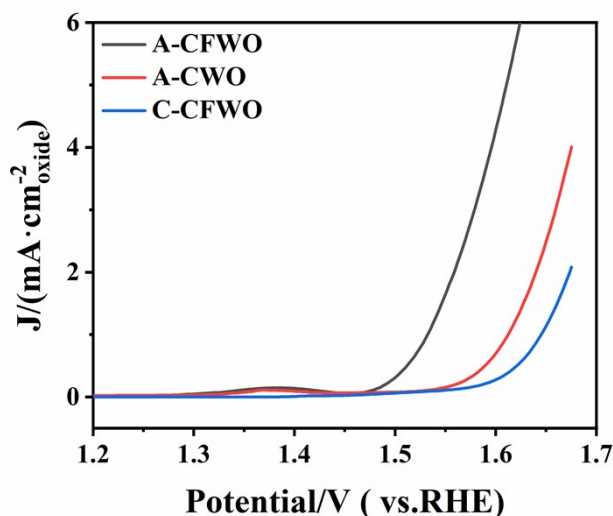

**Fig. S4** Polarization curves normalized to the electrochemical active surface area (ECSA).

The XPS peaks of Co 2p and O 1s of the A-CFWO catalyst after the OER test were recorded in Figure S5. The post-OER Co 2p spectra shows a sharpening of the main  $2p_{3/2}$  and  $2p_{1/2}$  and a dramatic decrease in intensity of the satellite structures, which should be related to a significant increase in the valence state of cobalt<sup>3, 4</sup>. In addition, new features can be clearly seen for O 1s after the OER test. The new peak at around 532 eV was observed and was further deconvoluted to OH and OOH group<sup>5</sup>. Therefore, the appearance of OOH component in O 1s and the higher oxidation state of cobalt in Co 2p indicate the formation of CoOOH layer on the surface of A-CFWO after the OER reaction. Furthermore, the area ratio between Co 2p and W 4f before and after the OER was analyzed and compared. The ratio increases from about 0.8 for as-prepared A-CFWO to about 9.7 for A-CFWO after the OER measurements. In short, the significantly higher area ratio supports the formation of highly active CoOOH layer<sup>6</sup> after the OER measurements for A-CFWO and may explain the origin of its superior OER activity. The post Co 2p and O 1s spectra of A-CFWO after HER are rather similar to those of as-prepared ones. The noticeable differences are the appearance of H<sub>2</sub>O (about 536 eV) and the broadening of O 1s, which could be related to the presence of OH group. Therefore, it is reasonable to conclude that A-CFWO shows a high stability for the HER reaction.

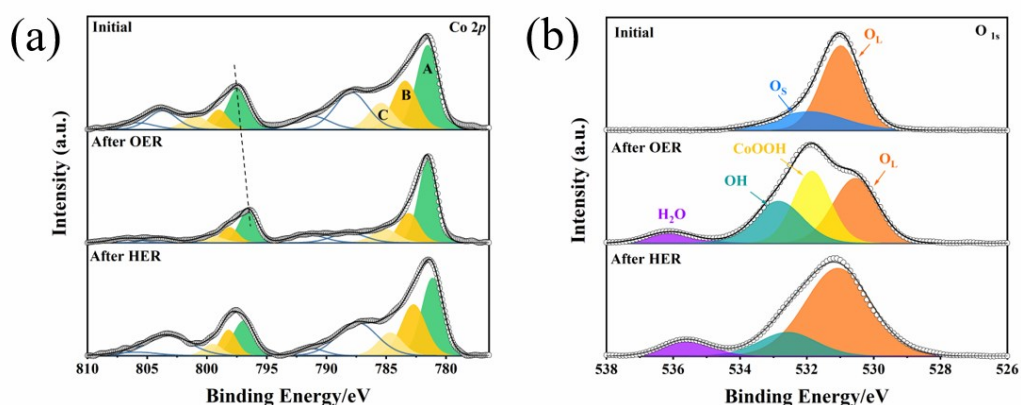

Fig. S5 The XPS spectra of (a) Co 2p, (b) O 1s of A-CFWO after OER and HER test.

Table S5, S6 and S7 show the OER, HER activity and overall water splitting comparison of A-CFWO with some of most reported state-of-the art electrocatalysts in the literature.

**Table S5** Comparison of OER activity of A-CFWO with the literature.

| Catalysts                                                             | Overpotentia<br>1 ( $\eta_{10}$ ) | Electrode       | Electrolyte | Reference |
|-----------------------------------------------------------------------|-----------------------------------|-----------------|-------------|-----------|
| <b>A-CFWO</b>                                                         | 259                               | Ni foam         | 1M KOH      | This Work |
| <b>Co<sub>0.708</sub>Fe<sub>0.292</sub>WO<sub>4</sub></b>             | 327                               | GCE             | 1M KOH      | 7         |
| <b>CoWO<sub>4</sub> NPs</b>                                           | 336                               | Ni              | 1M KOH      | 8         |
| <b>CoNi-CuHP/NF</b>                                                   | 299                               | Ni foam         | 1M KOH      | 9         |
| <b>NiCoFeB</b>                                                        | 284                               | Ni foam         | 1M KOH      | 10        |
| <b>Ni<sub>0.75</sub>Fe<sub>0.125</sub>V<sub>0.125</sub>-<br/>LDHs</b> | 361                               | Ni foam         | 1M KOH      | 11        |
| <b>MoO<sub>2</sub></b>                                                | 300                               | Ni foam         | 1M KOH      | 12        |
| <b>CoWO<sub>4-x</sub>@C</b>                                           | 295                               | Carbon<br>paper | 1M KOH      | 13        |
| <b>IrO<sub>2</sub></b>                                                | 309                               | Ni foam         | 1M KOH      | 14        |
| <b>FeNi@FeNiB-700</b>                                                 | 399                               | Ni foam         | 1M KOH      | 15        |
| <b>LCO</b>                                                            | 381                               | GCE             | 1M KOH      | 16        |

Note:  $\eta_{10}$ : overpotential at 10 mA cm<sup>-2</sup>.

**Table S6** Comparison of HER acidity of A-CFWO with the literature.

| Catalysts     | Overpotential<br>( $\eta_{10}$ ) | Electrode | Electrolyte | Reference |
|---------------|----------------------------------|-----------|-------------|-----------|
| <b>A-CFWO</b> | 118.2                            | Ni foam   | 1M KOH      | This Work |

|                                                    |     |         |        |    |
|----------------------------------------------------|-----|---------|--------|----|
| <b>Co-Ni<sub>3</sub>N</b>                          | 194 | GCE     | 1M KOH | 17 |
| <b>PNC/Co</b>                                      | 289 | Ni foam | 1M KOH | 18 |
| <b>CoP nanowire/CC</b>                             | 209 | Ni foam | 1M KOH | 19 |
| <b>FeP nanowire arrays</b>                         | 194 | Ni foam | 1M KOH | 20 |
| <b>Co-Fe-P</b>                                     | 295 | Ni foam | 1M KOH | 21 |
| <b>Ni<sub>3</sub>S<sub>2</sub>-Ni<sub>2</sub>P</b> | 130 | Ni foam | 1M KOH | 22 |
| <b>NiCo<sub>2</sub>S<sub>4</sub>@NiFe LDH</b>      | 200 | Ni foam | 1M KOH | 23 |
| <b>CuCo-Ni<sub>3</sub>S<sub>2</sub></b>            | 204 | Ni foam | 1M KOH | 24 |
| <b>3D Ni<sub>3</sub>S<sub>2</sub></b>              | 182 | Ni foam | 1M KOH | 25 |
| <b>NiFeS</b>                                       | 180 | Ni foam | 1M KOH | 26 |

Note:  $\eta_{10}$ : overpotential at 10 mA cm<sup>-2</sup>.

GCE: Glassy Carbon Electrode

**Table S7** Comparison of overall water splitting performance of A-CFWO with the literature.

| Catalysts                                                | Electrolyte | HER vs. RHE (V) @ 10 mA cm <sup>-2</sup> ) | OER vs. RHE (V) @ 10 mA cm <sup>-2</sup> | Full Water Splitting vs. RHE (V) @ 10 mA cm <sup>-2</sup> | Reference |
|----------------------------------------------------------|-------------|--------------------------------------------|------------------------------------------|-----------------------------------------------------------|-----------|
| <b>A-CFWO</b>                                            | 1M KOH      | -0.118                                     | 1.489                                    | 1.55                                                      | This Work |
| <b>Ni<sub>3</sub>S<sub>2</sub>/NF</b>                    | 1M KOH      | -0.223                                     | 1.49                                     | 1.76                                                      | 27        |
| <b>Ni<sub>5</sub>P<sub>4</sub> Films/Ni foil</b>         | 1M KOH      | -0.15                                      | 1.56                                     | <1.7                                                      | 28        |
| <b>NiCoP/NF</b>                                          | 1M KOH      | -0.032                                     | 1.51                                     | 1.58                                                      | 29        |
| <b>Ni<sub>0.69</sub>Co<sub>0.31</sub>-P</b>              | 1M KOH      | -0.096                                     | 1.496                                    | 1.59                                                      | 30        |
| <b>Co<sub>4</sub>Ni<sub>1</sub>P</b>                     | 1M KOH      | -0.129                                     | 1.475                                    | 1.59                                                      | 31        |
| <b>NiCo<sub>2</sub>S<sub>4</sub></b>                     | 1M KOH      | -0.21                                      | 1.49                                     | 1.63                                                      | 32        |
| <b>CP/CTs/Co-S</b>                                       | 1M KOH      | -0.19                                      | 1.536                                    | 1.743                                                     | 33        |
| <b>Ni<sub>1.5</sub>Fe<sub>0.5</sub>P</b>                 | 1M KOH      | -0.282                                     | 1.494                                    | 1.635                                                     | 34        |
| <b>Ni/Mo<sub>2</sub>C-PC</b>                             | 1M KOH      | -0.179                                     | 1.598                                    | 1.66                                                      | 35        |
| <b>f-CoP/CoP<sub>2</sub>/Al<sub>2</sub>O<sub>3</sub></b> | 1M KOH      | -0.066                                     | 1.53                                     | 1.65                                                      | 36        |

#### References:

1. C. C. McCrory, S. Jung, J. C. Peters and T. F. Jaramillo, *J. Am. Chem. Soc.*, 2013, **135**, 16977-16987.
2. L. Yang, H. Ren, Q. Liang, K. N. Dinh, R. Dangol and Q. Yan, *Small*, 2020, **16**, 1906766.

3. S. C. Petitto, E. M. Marsh, G. A. Carson and M. A. Langell, *J. Mol. Catal. A-Chem.*, 2008, **281**, 49-58.
4. Y. Lykhach, S. Piccinin, T. Skala, M. Bertram, N. Tsud, O. Brummel, M. Farnesi Camellone, K. Beranova, A. Neitzel, S. Fabris, K. C. Prince, V. Matolin and J. Libuda, *J. Phys. Chem. Lett.*, 2019, **10**, 6129-6136.
5. Y. Han, S. Axnanda, E. J. Crumlin, R. Chang, B. Mao, Z. Hussain, P. N. Ross, Y. Li and Z. Liu, *J. Phys. Chem. B*, 2018, **122**, 666-671.
6. M. Favaro, J. Yang, S. Nappini, E. Magnano, F. M. Toma, E. J. Crumlin, J. Yano and I. D. Sharp, *J. Am. Chem. Soc.*, 2017, **139**, 8960-8970.
7. W. Shao, Y. Xia, X. Luo, L. Bai, J. Zhang, G. Sun, C. Xie, X. Zhang, W. Yan and Y. Xie, *Nano Energy*, 2018, **50**, 717-722.
8. V. K. V. P. Srirapu, A. Kumar, P. Srivastava, R. N. Singh and A. S. K. Sinha, *Electrochim. Acta*, 2016, **209**, 75-84.
9. Y. Zhang, T. Qu, F. Bi, P. Hao, M. Li, S. Chen, X. Guo, M. Xie and X. Guo, *ACS Sustainable Chem. Eng.*, 2018, **6**, 16859-16866.
10. Y. Li, B. Huang, Y. Sun, M. Luo, Y. Yang, Y. Qin, L. Wang, C. Li, F. Lv, W. Zhang and S. Guo, *Small*, 2019, **15**, 1804212.
11. K. N. Dinh, P. Zheng, Z. Dai, Y. Zhang, R. Dangol, Y. Zheng, B. Li, Y. Zong and Q. Yan, *Small*, 2018, **14**, 1703257.
12. Y. Jin, H. Wang, J. Li, X. Yue, Y. Han, P. K. Shen and Y. Cui, *Adv. Mater.*, 2016, **28**, 3785-3790.
13. F. Luo, R. Xu, S. Ma, Q. Zhang, H. Hu, K. Qu, S. Xiao, Z. Yang and W. Cai, *Appl. Catal. B-Environ.*, 2019, **259**, 118090.
14. Y. Li, T. Zhao, M. Lu, Y. Wu, Y. Xie, H. Xu, J. Gao, J. Yao, G. Qian and Q. Zhang, *Small*, 2019, **15**, 1901940.
15. H. Yuan, S. Wang, X. Gu, B. Tang, J. Li and X. Wang, *J. Mater. Chem. A*, 2019, **7**, 19554-19564.
16. C. Zhao, N. Li, R. Zhang, Z. Zhu, J. Lin, K. Zhang and C. Zhao, *ACS Appl. Mater. Interfaces*, 2019, **11**, 47858-47867.
17. C. Zhu, A. L. Wang, W. Xiao, D. Chao, X. Zhang, N. H. Tiep, S. Chen, J. Kang, X. Wang, J. Ding, J. Wang, H. Zhang and H. J. Fan, *Adv. Mater.*, 2018, **30**, 1705516.
18. X. Li, Z. Niu, J. Jiang and L. Ai, *J. Mater. Chem. A*, 2016, **4**, 3204-3209.
19. J. Tian, Q. Liu, A. M. Asiri and X. Sun, *J. Am. Chem. Soc.*, 2014, **136**, 7587-7590.
20. C. Y. Son, I. H. Kwak, Y. R. Lim and J. Park, *Chem. Commun.*, 2016, **52**, 2819-2822.
21. T. Zhang, J. Du, P. Xi and C. Xu, *ACS Appl. Mater. Interfaces*, 2017, **9**, 362-370.
22. P. Wang, H. He, Z. Pu, L. Chen, C. Zhang, Z. Wang and S. Mu, *Dalton Trans.*, 2019, **48**, 13466-13471.
23. J. Liu, J. Wang, B. Zhang, Y. Ruan, L. Lv, X. Ji, K. Xu, L. Miao and J. Jiang, *ACS Appl. Mater. Interfaces*, 2017, **9**, 15364-15372.
24. J.-F. Qin, M. Yang, S. Hou, B. Dong, T.-S. Chen, X. Ma, J.-Y. Xie, Y.-N. Zhou,



- J. Nan and Y.-M. Chai, *Appl. Surf. Sci.*, 2020, **502**, 144172.
25. T. Zhu, L. Zhu, J. Wang and G. W. Ho, *J. Mater. Chem. A*, 2016, **4**, 13916-13922.
  26. P. Ganesan, A. Sivanantham and S. Shanmugam, *J. Mater. Chem. A*, 2016, **4**, 16394-16402.
  27. L. L. Feng, G. Yu, Y. Wu, G. D. Li, H. Li, Y. Sun, T. Asefa, W. Chen and X. Zou, *J. Am. Chem. Soc.*, 2015, **137**, 14023-14026.
  28. M. Ledendecker, S. Krick Calderon, C. Papp, H. P. Steinruck, M. Antonietti and M. Shalom, *Angew. Chem. Int. Ed.*, 2015, **54**, 12361-12365.
  29. H. Liang, A. N. Gandi, D. H. Anjum, X. Wang, U. Schwingenschlogl and H. N. Alshareef, *Nano Lett.*, 2016, **16**, 7718-7725.
  30. Z. Yin, C. Zhu, C. Li, S. Zhang, X. Zhang and Y. Chen, *Nanoscale*, 2016, **8**, 19129-19138.
  31. L. Yan, L. Cao, P. Dai, X. Gu, D. Liu, L. Li, Y. Wang and X. Zhao, *Adv. Funct. Mater.*, 2017, **27**, 1703455.
  32. A. Sivanantham, P. Ganesan and S. Shanmugam, *Adv. Funct. Mater.*, 2016, **26**, 4661-4672.
  33. J. Wang, H. X. Zhong, Z. L. Wang, F. L. Meng and X. B. Zhang, *ACS Nano*, 2016, **10**, 2342-2348.
  34. H. Huang, C. Yu, C. Zhao, X. Han, J. Yang, Z. Liu, S. Li, M. Zhang and J. Qiu, *Nano Energy*, 2017, **34**, 472-480.
  35. Z. Y. Yu, Y. Duan, M. R. Gao, C. C. Lang, Y. R. Zheng and S. H. Yu, *Chem. Sci.*, 2017, **8**, 968-973.
  36. W. Li, S. Zhang, Q. Fan, F. Zhang and S. Xu, *Nanoscale*, 2017, **9**, 5677-5685.
