# Supplementary figures and images for: High-performance overall water splitting based on amorphous iron doped cobalt tungstate via facile co-precipitation
Source: Royal Society of Chemistry journal article supplement (doi:10.1039/d1ta00001b), 2021-01-01

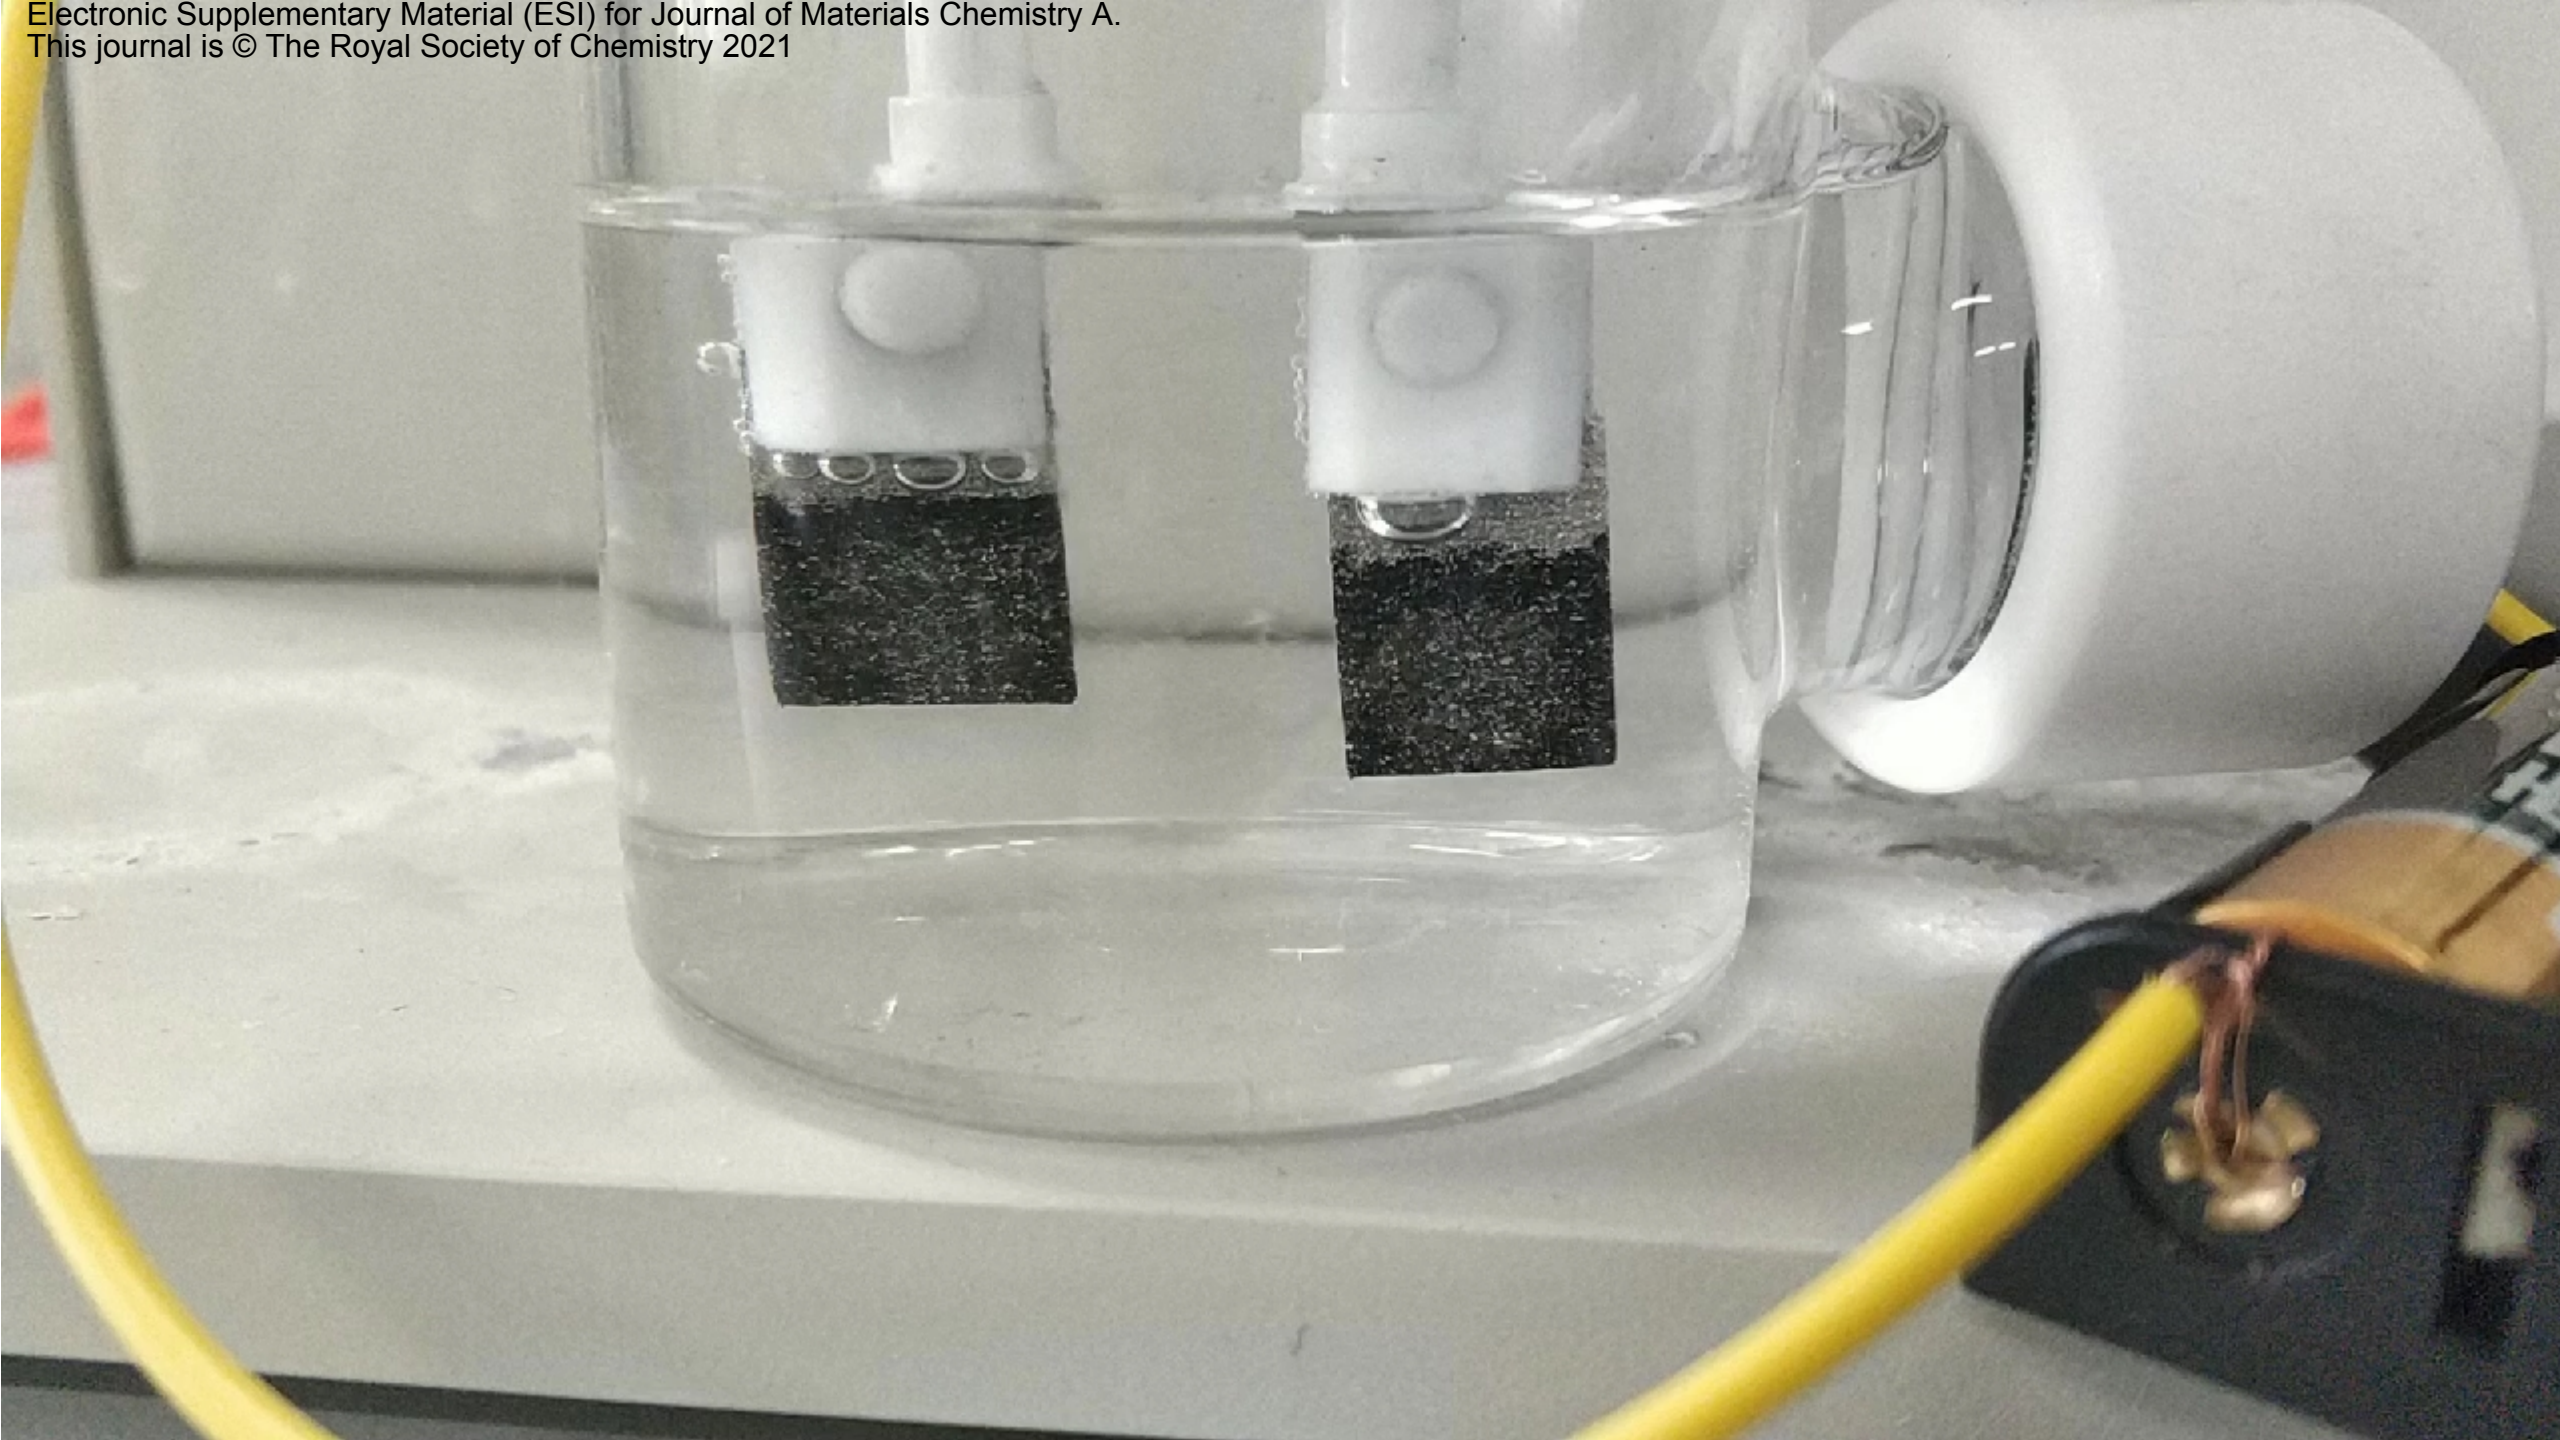

Supplement: d1ta00001b2.pdf [file d1ta00001b2.pdf]
